# Supplementary figures and images for: hESC-derived neural progenitors prevent xenograft rejection through neonatal desensitisation
Source: PubMed Central journal article supplement — Exp Neurol. 2016 Aug;282:78–85. doi: 10.1016/j.expneurol.2016.05.027 (PMC4920671; doi:10.1016/j.expneurol.2016.05.027), 2016-08

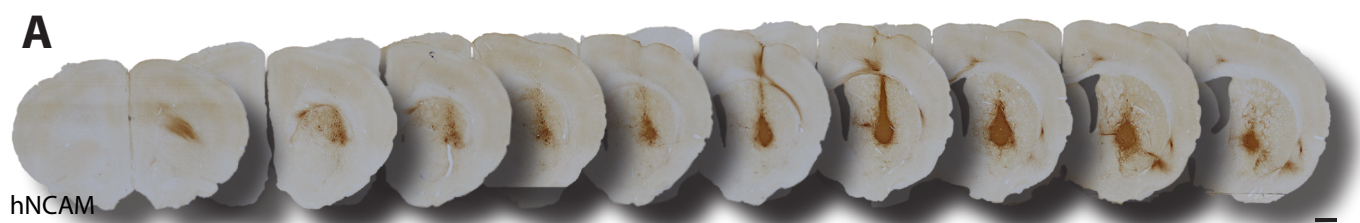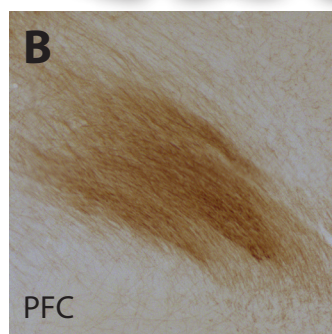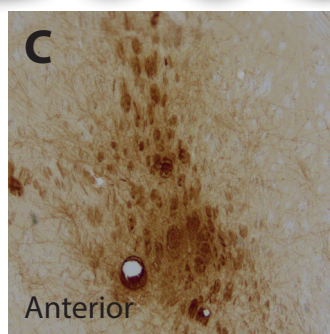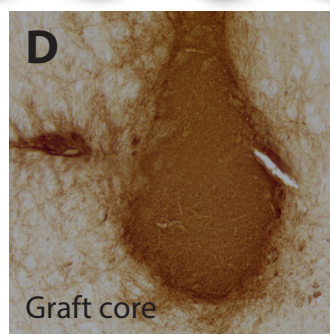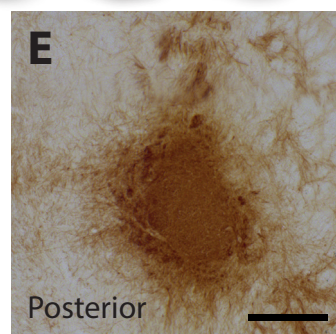

Supplement: mmc1.pdf [file mmc1.pdf]
